# Supplementary material
Source: PubMed Central journal article supplement (PMC2729616)
Supplement: tpc.109.065821_1.pdf [file tpc.109.065821_1.pdf]

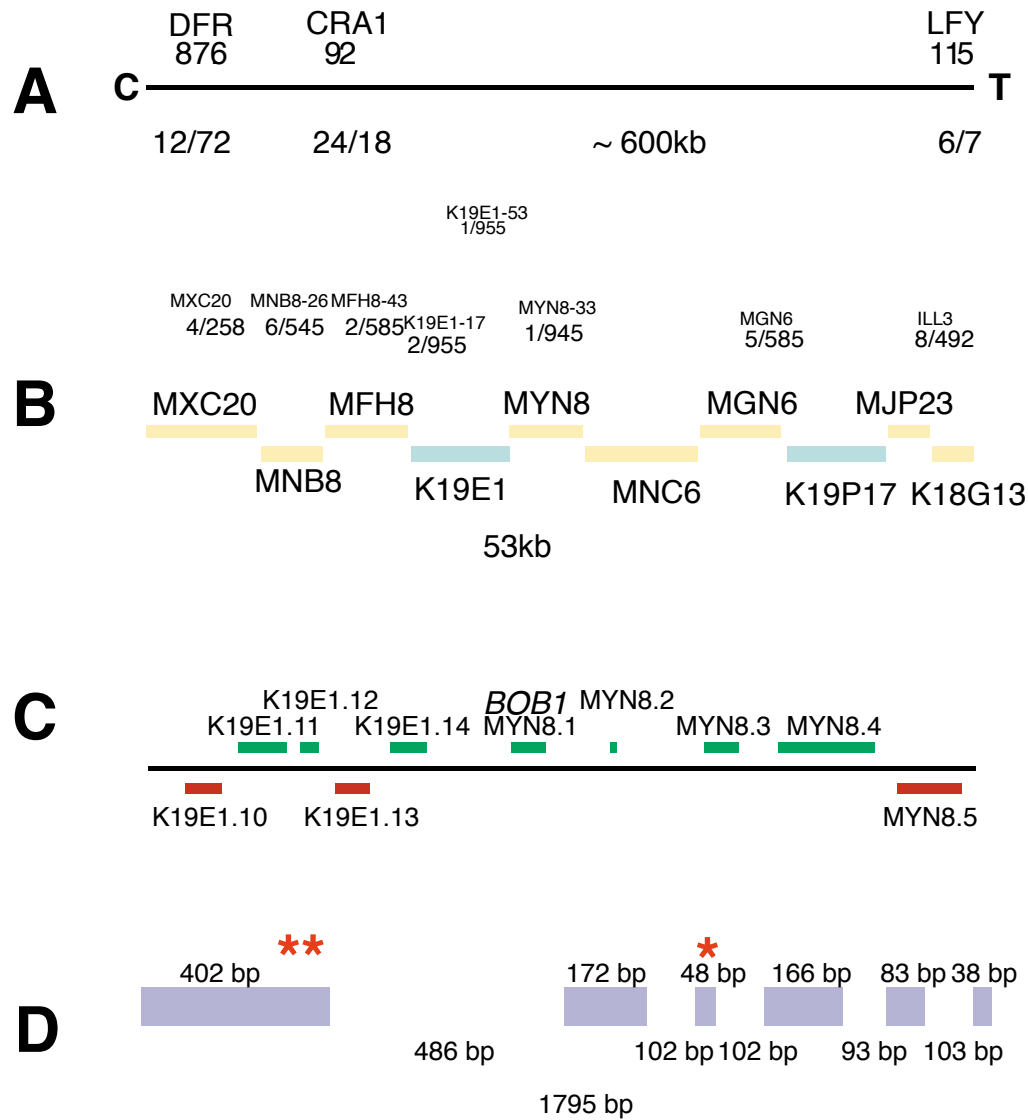

**Supplemental Figure 1. Map based cloning strategy for the *BOBBER1* locus.** **A.** Region of chromosome 5 to which the *bob1-1* mutation maps. **B.** Number of recombinants isolated between *bob1-1* and markers located on cosmids within a 600 bp region of chromosome 5. **C.** Annotated genes within the 53 kb region to which *bob1* was narrowed down. **D.** Intron-exon structure of MYN8-1 (At5g53400) showing position of stop codon in *bob1-1* mutation (asterisk) and the *bob1-2* T-DNA insertion (double asterisk).

**A. pREJ14 *BOBBER* rescue plasmid**

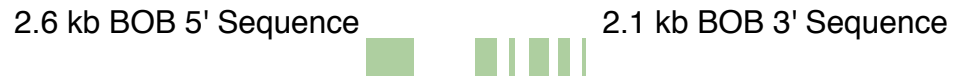

**B. pREJ 19 *BOBBER*-GUS reporter construct**

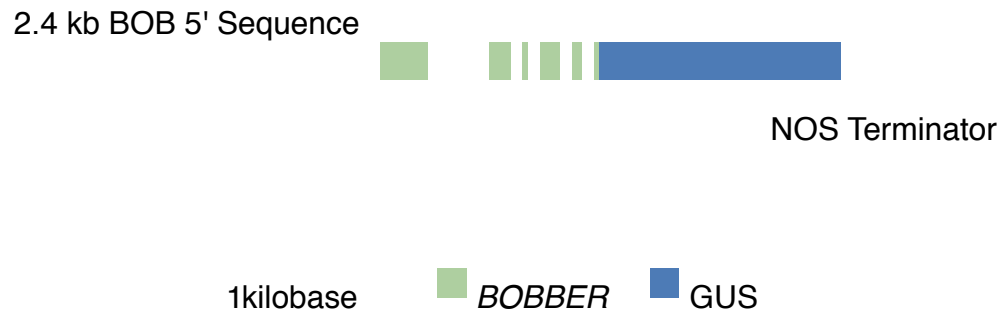

Supplemental Figure 2. Composition of constructs used to rescue *bob1* mutant phenotype (A) and to test localization of *BOBBER1* promoter activity (B).

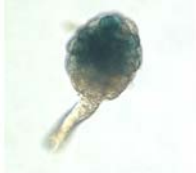

Supplemental Figure 3. Homozygous bobber1-2 mutant embryo showing ectopic expression of STM reporter.

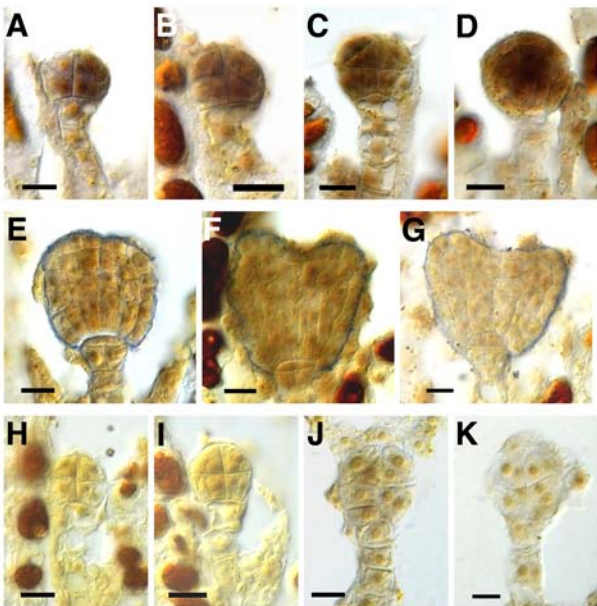

Supplemental Figure 4. *BOBBER* mRNA expression in wild-type and *bobber* mutant *Arabidopsis* embryos. *BOBBER* is expressed throughout the early embryo. A-B. Wild-type 4-8 celled embryos. C. Wild-type 16 celled embryo, just after protoderm division. D. Wild-type globular embryo. E. Wild-type transition-stage embryo. *BOB* expression does not appear to be as strong at this stage. F-G. Wild-type early heart-stage embryos. *BOB* expression is weaker and more variable at heart stage than at earlier stages in embryogenesis, and becomes undetectable after heart stage. H-K. There is no detectable *BOB* transcript accumulation in *bobber* mutant embryos. H-I. *bobber* embryos whose wild-type siblings are globular-stage embryos, similar to embryo in panel D. J. *bobber* embryo, sibling to wild-type transition-stage embryo in panel E. K. *bobber* embryo, sibling to wild-type early heart-stage embryo in panel G. Scale bars = 10  $\mu$ m.

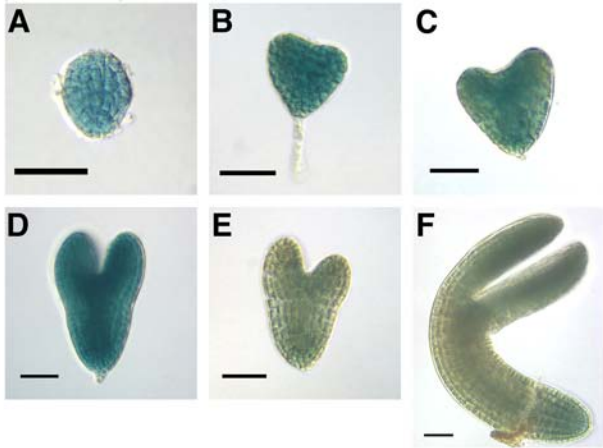

Supplemental Figure 5. Expression of pREJ19, a BOBBER-GUS fusion protein, in wild-type embryos. A-F. Embryos from one individual in line pREJ19-1. Expression of BOB-GUS is ubiquitous throughout the early embryo (A-C), but becomes variable at about the heart stage (C-D) and mostly or completely ceases by the end of embryogenesis (F). Scale bars = 50  $\mu$ m.

**Supplemental Table 1: Segregation of *bobber1* mutant embryos in *bob1-1/+* and *bob1-1/+ stm-11/+* families.**

| <b>Cross</b>                                 | <b>F1 Progeny</b>                     | <b><i>STM</i><br/>genotype</b> | <b><i>bob1</i><br/>embryos</b> | <b>Wt<br/>embryos</b> | <b>% bobber1</b> |
|----------------------------------------------|---------------------------------------|--------------------------------|--------------------------------|-----------------------|------------------|
| <i>bob1-1/+ x<br/>stm/+<br/>individual 1</i> |                                       |                                |                                |                       |                  |
|                                              | <i>bob1-1/+ ind. 1</i>                | <i>stm-11/+</i>                | 99                             | 340                   | 22.6%            |
|                                              | <i>bob1-1/+ ind. 2</i>                | +/+                            | 82                             | 281                   | 22.6%            |
|                                              | <i>bob1-1/+ ind. 3</i>                | <i>stm-11/+</i>                | 65                             | 180                   | 26.5%            |
|                                              | <i>bob1-1/+ ind. 4</i>                | +/+                            | 71                             | 216                   | 24.7%            |
| <i>bob1-1/+ x<br/>stm/+<br/>individual 4</i> |                                       |                                |                                |                       |                  |
|                                              | <i>bob1-1/+ ind. 1</i>                | <i>stm-11/+</i>                | 77                             | 272                   | 22.1%            |
| <i>bob1-1/+ x<br/>stm/+<br/>individual 5</i> |                                       |                                |                                |                       |                  |
|                                              | <i>bob1-1/+ ind. 1</i>                | +/+                            | 67                             | 205                   | 24.6%            |
|                                              | <i>bob1-1/+ ind. 2</i>                | +/+                            | 112                            | 346                   | 24.5%            |
|                                              | <i>bob1-1/+ ind. 3</i>                | <i>stm-11/+</i>                | 61                             | 204                   | 23.0%            |
|                                              | <i>bob1-1/+ ind. 4</i>                | +/+                            | 83                             | 262                   | 24.1%            |
|                                              | <i>bob1-1/+ ind. 5</i>                | +/+                            | 62                             | 224                   | 21.7%            |
| <i>bob1-1/+ x<br/>stm/+<br/>individual 6</i> |                                       |                                |                                |                       |                  |
|                                              | <i>bob1-1/+ ind. 1</i>                | +/+                            | 96                             | 310                   | 23.6%            |
|                                              | <i>bob1-1/+ ind. 2</i>                | +/+                            | 65                             | 212                   | 23.5%            |
|                                              | <i>bob1-1/+ ind. 3</i>                | <i>stm-11/+</i>                | 81                             | 272                   | 22.9%            |
|                                              | <i>bob1-1/+ ind. 4</i>                | <i>stm-11/+</i>                | 61                             | 179                   | 25.4%            |
|                                              | <i>bob1-1/+ ind. 5</i>                | +/+                            | 85                             | 225                   | 27.4%            |
|                                              | <i>bob1-1/+ ind. 6</i>                | +/+                            | 64                             | 166                   | 27.8%            |
|                                              |                                       |                                |                                |                       |                  |
|                                              | Total for <i>stm/+</i><br>individuals |                                | 444                            | 1447                  | 23.5%            |
|                                              | Total for <i>+/+</i><br>individuals   |                                | 787                            | 2447                  | 24.3%            |

|                           |      |                   |                                   |
|---------------------------|------|-------------------|-----------------------------------|
| Chi-squared<br>(25%) =    | 2.3  | 0.25 < p <<br>0.1 | H <sub>0</sub> is not<br>rejected |
| Chi-squared<br>(18.75%) = | 27.8 | p < 0.001         | H <sub>0</sub> is<br>rejected     |

**Supplemental Table 2: CAPS Markers Developed for Mapping the *bobber1* mutation.**

| Marker   | Primer sequences                  | Restriction Cleavage |                       |
|----------|-----------------------------------|----------------------|-----------------------|
|          |                                   | enzyme               | products (kb)         |
| ILL3     | F: 5'-GCGTTGGGTGGGAAGAAGAGA-3'    | Nde I                | Ler: 0.95, 0.25       |
|          | R: 5'-GCCAACACCGGATCAACACAA-3'    |                      | Col: 1.2              |
| K19E1-17 | F: 5'-ATGGCAGATGATGACTTGAG-3'     | Rsa I                | Ler: 0.9, 0.35        |
|          | R: 5'-ATTACGCTTTTCCATTACACA-3'    |                      | Col: 1.2              |
| K19E1-53 | F: 5'-CTCCGCCGGTAAGATTTTGTATGT-3' | Dpn II               | Ler: 0.45, 0.25       |
|          | R: 5'-ATCTCCCGTATCGCTGTGAACC-3'   |                      | Col: 0.45, 0.2        |
| MFH8-43  | F: 5'-GGCTTCCCCGTTTGTTCATCA-3'    | Ava I                | Ler: 1.2, 0.4         |
|          | R: 5'-CATCAAGGTCCGGGTGGTCAT-3'    |                      | Col: 0.5, 0.7, 0.4    |
| MGN6     | F: 5'-GTGGCAGAAGTGTGGGTTGTT-3'    | Dde I                | Ler: top band at 1.1* |
|          | R: 5'-TGAGCCGGTAAGCATCTGAA-3'     |                      | Col: top band at 0.9* |
| MNB8-26  | F: 5'-GTGTCGGGTTTGGCTTCTTCTTG-3'  | Xba I                | Ler: 1.1, 0.4*        |
|          | R: 5'-TTATGTTGCGGCGACTTTTGTGTA-3' |                      | Col: 1.5*             |
| MXC20    | F: 5'-AGCTCGCTCCCATGTTGTATC-3'    | Mse I                | Ler: doublet at 0.3*  |
|          | R: 5'-ACGGGGAAGACGGAGACC-3'       |                      | Col: 0.35, 0.2*       |
| MYN8-33  | F: 5'-TCTAGGGGACAGGCTTCTTTCAT-3'  | Dde I                | Ler: 1.0              |
|          | R: 5'-TGCGGCGTAATCGTAATCTGTAT-3'  |                      | Col: 0.7, 0.3         |

\*Other bands present but of equal size in two ecotypes.

**Supplemental Table 3. Complementation of the *bobber1* Phenotype by the Wild-type *BOBBER1* transgene.**

| Cross                                | Progeny      | <i>bob1</i> embryos | Wild-type embryos | Total embryos | % bobber1 |
|--------------------------------------|--------------|---------------------|-------------------|---------------|-----------|
| pREJ14-9 x<br>bob1/+ individual<br>1 |              |                     |                   |               |           |
|                                      | Individual 1 | 9                   | 73                | 82            | 11.0%     |
|                                      | Individual 2 | 3                   | 62                | 65            | 4.6%      |
|                                      | Individual 3 | 3                   | 46                | 49            | 6.1%      |
| pREJ14-9 x<br>bob1/+ individual<br>2 |              |                     |                   |               |           |
|                                      | Individual 1 | 3                   | 157               | 160           | 1.9%      |
|                                      | Individual 2 | 7                   | 114               | 121           | 5.8%      |
|                                      | Individual 3 | 16                  | 233               | 249           | 6.4%      |
|                                      |              |                     |                   |               |           |
|                                      | Total        | 41                  | 685               | 726           | 5.6%      |

Chi-squared:            0.45            p = 0.5            for 1:15            H0 is not rejected  
                                  145.02            p << 0.001            for 1:3            H0 is rejected



**Supplemental Table 4. Complementation Data for *bob1-1* and *bob1-2*.**

| <b>Cross</b>                      | <b>Numer of siliques scored</b> | <b>Aborted embryos</b> | <b>WT embryos</b> | <b>% aborted embryos</b> |
|-----------------------------------|---------------------------------|------------------------|-------------------|--------------------------|
| <i>bob1-2/+</i> self-cross        | 10                              | 86                     | 252               | 25.4                     |
| <i>bob1-2/+</i> x <i>bob1-1/+</i> | 8                               | 82                     | 210               | 28.1                     |
| Col-O x <i>bob1-2/+</i>           | 6                               | 4                      | 298               | 1.3                      |
